# Supplementary material for: Sensitivity Enhanced Ecofriendly UV Spectrophotometric Methods for Quality Control of Telmisartan and Benidipine Formulations: Comparison of Whiteness and Greenness with HPLC Methods
Source: MDPI journal article supplement (doi:10.3390/ijerph19127260), 2022-06-14
Supplement: s1 [file s1]

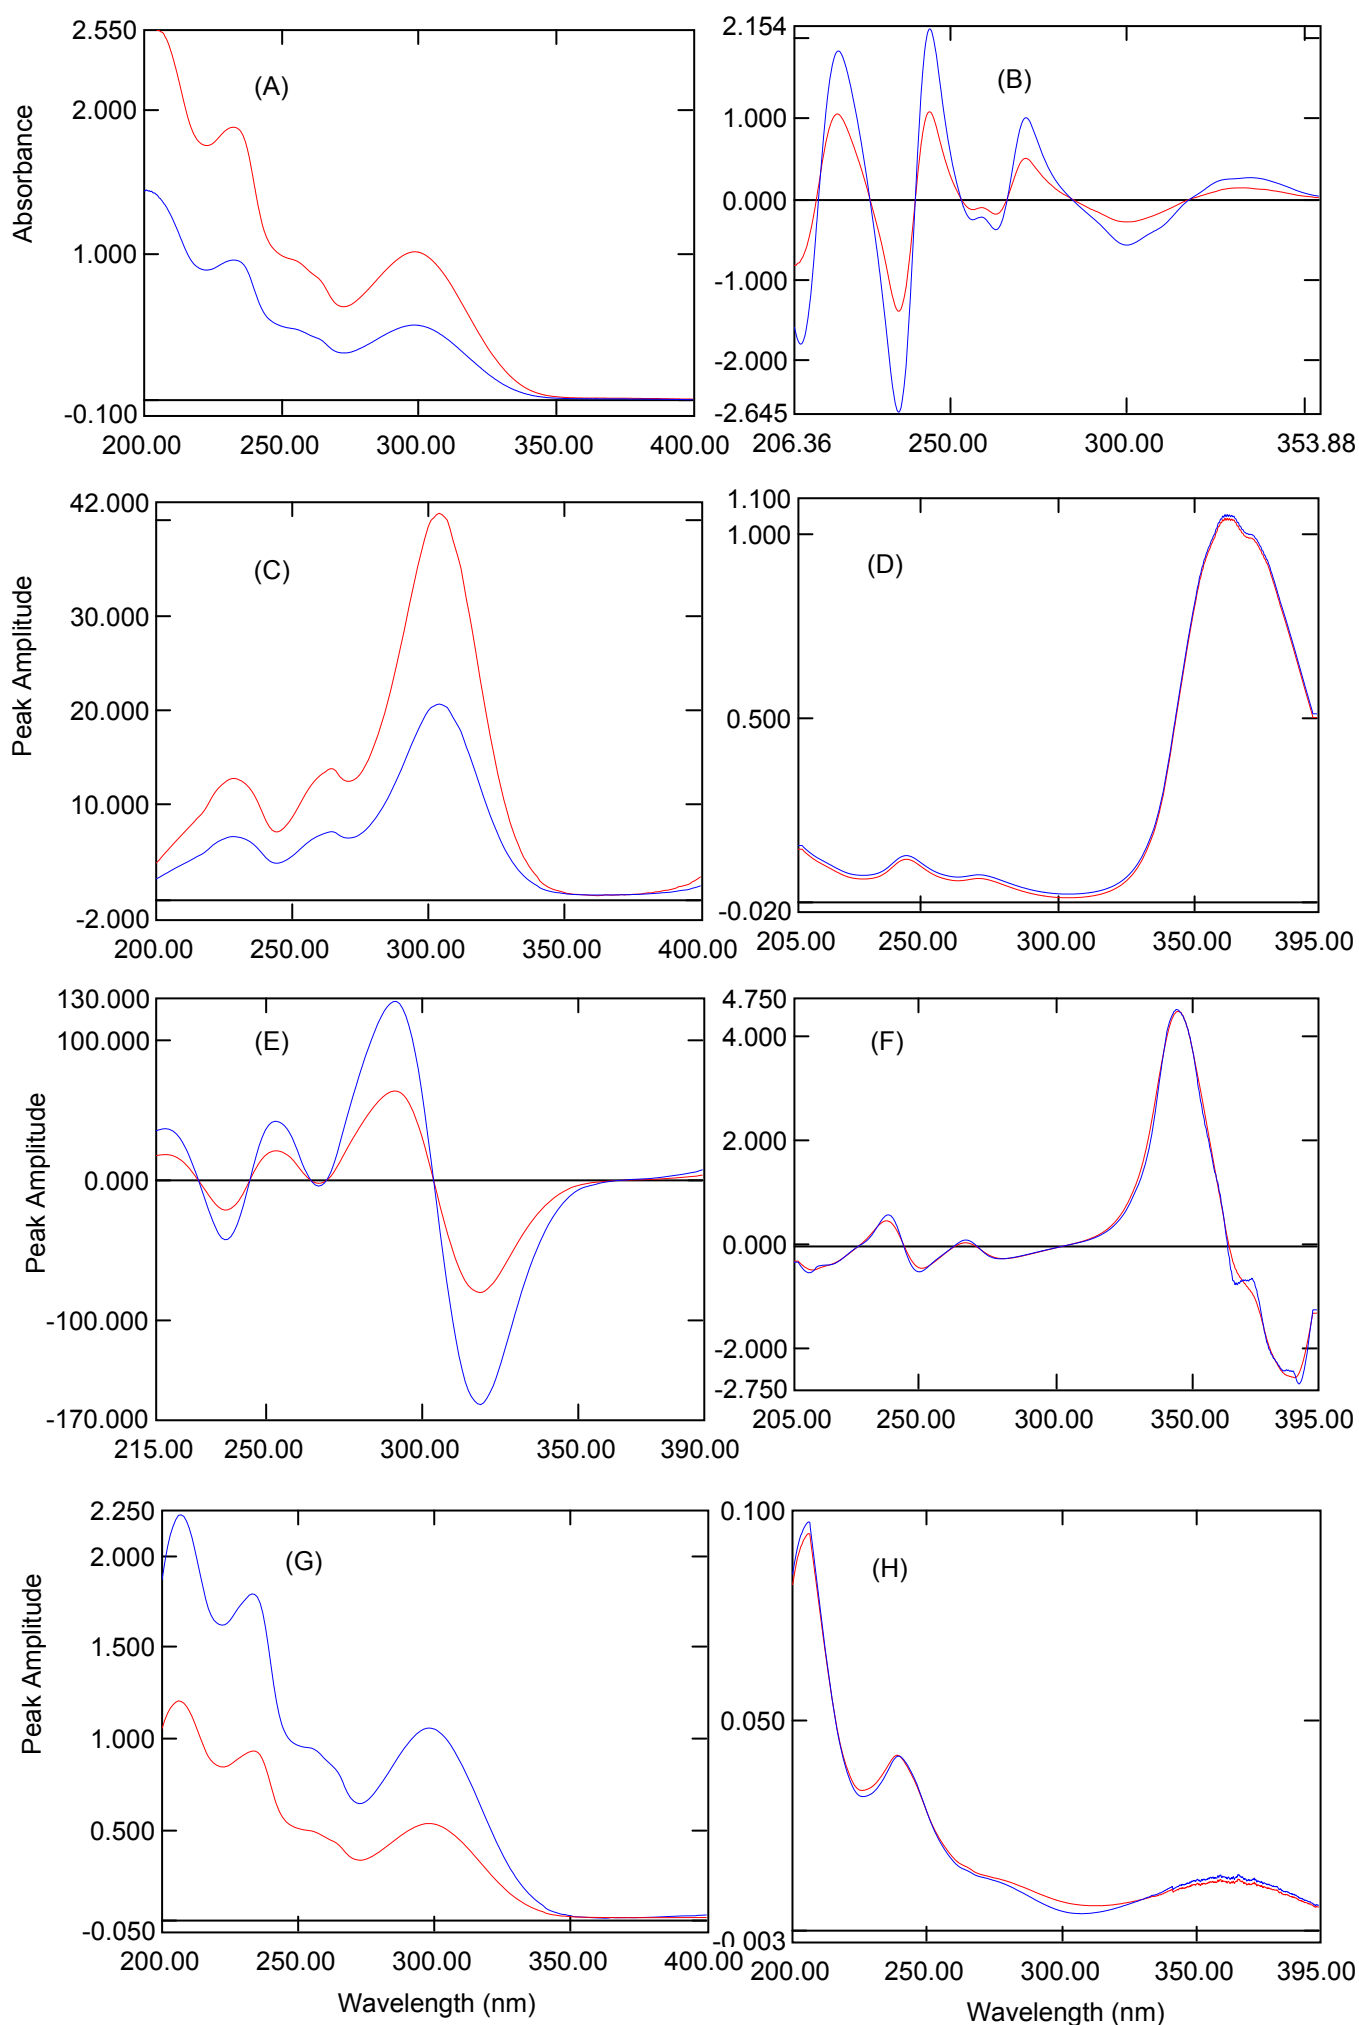

Supplementary Figures S1: UV absorption spectra of BEN and TEL formulation : Normal spectra(A)

Second derivative spectra (B) Ratio derivative spectra of TEL (C) and BEN (D)

Ratio first derivative spectra of TEL (E) and BEN (F) Zero order spectra of TEL (G) and BEN (H)
