# Supplementary material for: Sensitivity Enhanced Ecofriendly UV Spectrophotometric Methods for Quality Control of Telmisartan and Benidipine Formulations: Comparison of Whiteness and Greenness with HPLC Methods
Source: MDPI journal article supplement (doi:10.3390/ijerph19127260), 2022-06-14
Supplement: s1 [file s1]

Supplimentary Table S1: White analytical chemistry

| RED<br>PRINCIPLES<br>(analytical<br>performance) |               |                         | R1: Scope of application                             |              | R2: LOD and LOQ                  |                  | R3: Precision                             |                                                      |                                                               | R4: Accuracy               |                                    |                                |
|--------------------------------------------------|---------------|-------------------------|------------------------------------------------------|--------------|----------------------------------|------------------|-------------------------------------------|------------------------------------------------------|---------------------------------------------------------------|----------------------------|------------------------------------|--------------------------------|
|                                                  | Method number | Method name             | 0-100                                                | LOD          | LOQ                              | 0-100            | RSD% (repeatability)                      | RSD% (reproducibility)                               | 0-100                                                         | Relative error (%)         | Recovery (%)                       | 0-100                          |
|                                                  | 1             | UV spectroscopic method | 95                                                   | 0.088, 0.287 | 0.293-0.962                      | 96               | 0.679-1.622                               | 0.964-1.796                                          | 100                                                           | 0.670-1.70                 | 98.37-100.76                       | 100                            |
|                                                  | 2             | HPLC APCR               | 100                                                  | 0.133-0.402  | 0.458-2.589                      | 80               | 0.671- 0.509                              | 0.604-1.690                                          | 100                                                           | ----                       | 98.98-101.50                       | 100                            |
|                                                  | 3             | HPLC IJSR               | 100                                                  | 0.19-1.19    | 2.57-2.94                        | 75               | 0.63-1.57                                 | 0.11-0.63                                            | 100                                                           | ----                       | 99.77-100.31                       | 100                            |
|                                                  | 4             | HPLC WJPPS              | 100                                                  | 0.147-1.306  | 0.444-3.956                      | 70               | 0.44-0.55                                 | 0.25-0.91                                            | 100                                                           | ----                       | 99.45-101.17                       | 100                            |
| GREEN<br>PRINCIPLES<br>(green chemistry)         |               |                         | G1: Toxicity of reagents (impact and biodegradation) |              | G2: Amount of reagents and waste |                  | G3: Consumption of energy and other media | G4: Direct impacts (safety, use of animals and GMOs) |                                                               |                            |                                    |                                |
|                                                  | Method number | Method name             | Total number of pictograms                           | 0-100        | Reagent consumption              | Waste production | 0-100                                     | 1-100                                                | Occupational hazards                                          | Safety of users (0-100)    | Use of animals (0 if no, 1 if yes) | Use of GMO (0 if no, 1 if yes) |
|                                                  | 1             | UV spectroscopic method | Safe and biodegradable                               | 95           | < 10ml                           | < 10ml           | 95                                        | 95                                                   | Not Hazardous                                                 | 100                        | 0                                  | 0                              |
|                                                  | 2             | HPLC APCR               | Toxic                                                | 75           | >10 ml                           | >10 ml           | 75                                        | 75                                                   | Hazardous                                                     | 80                         | 0                                  | 0                              |
|                                                  | 3             | HPLC IJSR               | Toxic                                                | 65           | >10 ml                           | >10 ml           | 75                                        | 75                                                   | Hazardous                                                     | 70                         | 0                                  | 0                              |
|                                                  | 4             | HPLC WJPPS              | Toxic                                                | 75           | >10 ml                           | >10 ml           | 75                                        | 75                                                   | Hazardous                                                     | 80                         | 0                                  | 0                              |
| BLUE<br>PRINCIPLES<br>(practical side)           |               |                         | B1: Cost-efficiency                                  |              | B2: Time-efficiency              |                  | B3: Requirements                          |                                                      |                                                               | B4: Operational simplicity |                                    |                                |
|                                                  | Method number | Method name             | Total cost USD/Sample                                | 0-100        | Speed of analysis /Hour          | 0-100            | Sample consumption                        | Sample consumption (0-100)                           | Other needs: advanced instruments, skills, facilities (0-100) | Miniaturization (0-100)    | Integration and automation (0-100) | Portability (0-100)            |
|                                                  | 1             | UV spectroscopic method | 5                                                    | 100          | 60 samples                       | 100              | in micrograms                             | 100                                                  | 100                                                           | 90                         | 95                                 | 95                             |
|                                                  | 2             | HPLC APCR               | 8                                                    | 90           | 7 samples                        | 75               | in micrograms                             | 100                                                  | 95                                                            | 95                         | 100                                | 95                             |
|                                                  | 3             | HPLC IJSR               | 7                                                    | 95           | 12 samples                       | 85               | in micrograms                             | 100                                                  | 95                                                            | 95                         | 100                                | 95                             |
|                                                  | 4             | HPLC WJPPS              | 8                                                    | 90           | 7 samples                        | 75               | in micrograms                             | 100                                                  | 95                                                            | 95                         | 100                                | 95                             |

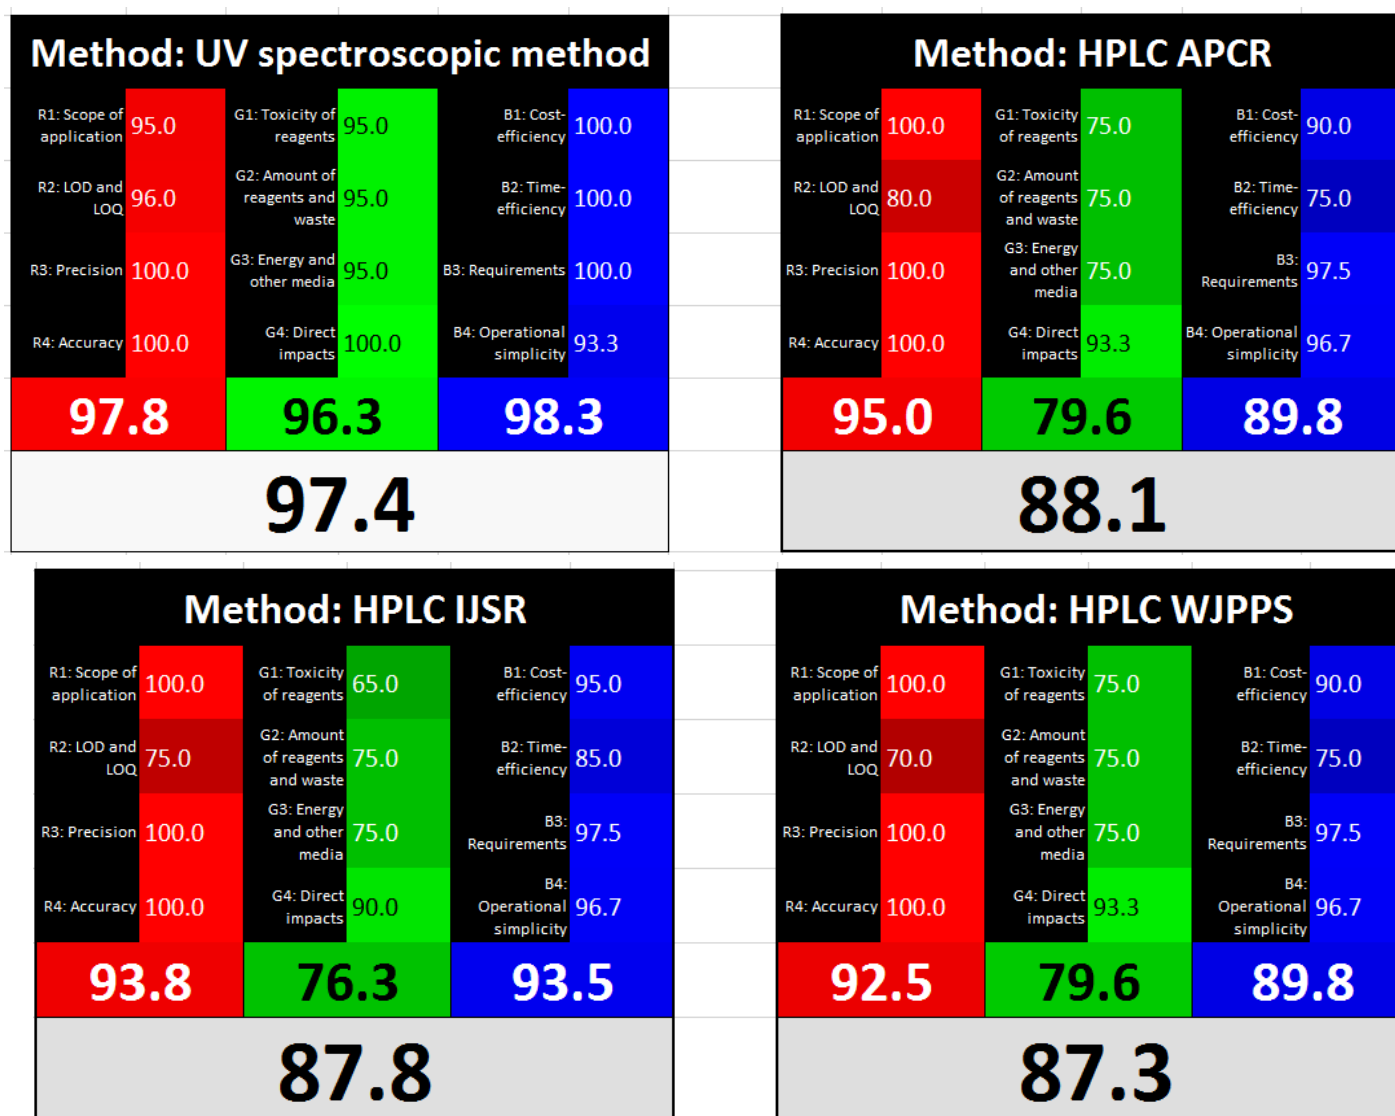

Figure S3: whiteness score of UV spectroscopic method and reported HPLC methods
